# Supplementary material
Source: PubMed Central journal article supplement (PMC3431652)
Supplement: supp_M112.370189_jbc.M112.370189-1.pdf [file supp_M112.370189_jbc.M112.370189-1.pdf]

## **Supplemental Data**

### **A Structural Basis for the Biochemical Behavior of Activation-induced Deoxycytidine Deaminase Class-switch Recombination Defective Hyper-IgM-2 Mutants**

*Yunxiang Mu, Courtney Prochnow, Phuong Pham, Xiaojiang S. Chen and Myron F. Goodman*

Departments of Biological Sciences and Chemistry, Molecular and Computational Biology Section, University of Southern California, Los Angeles, California 90089-2910, USA

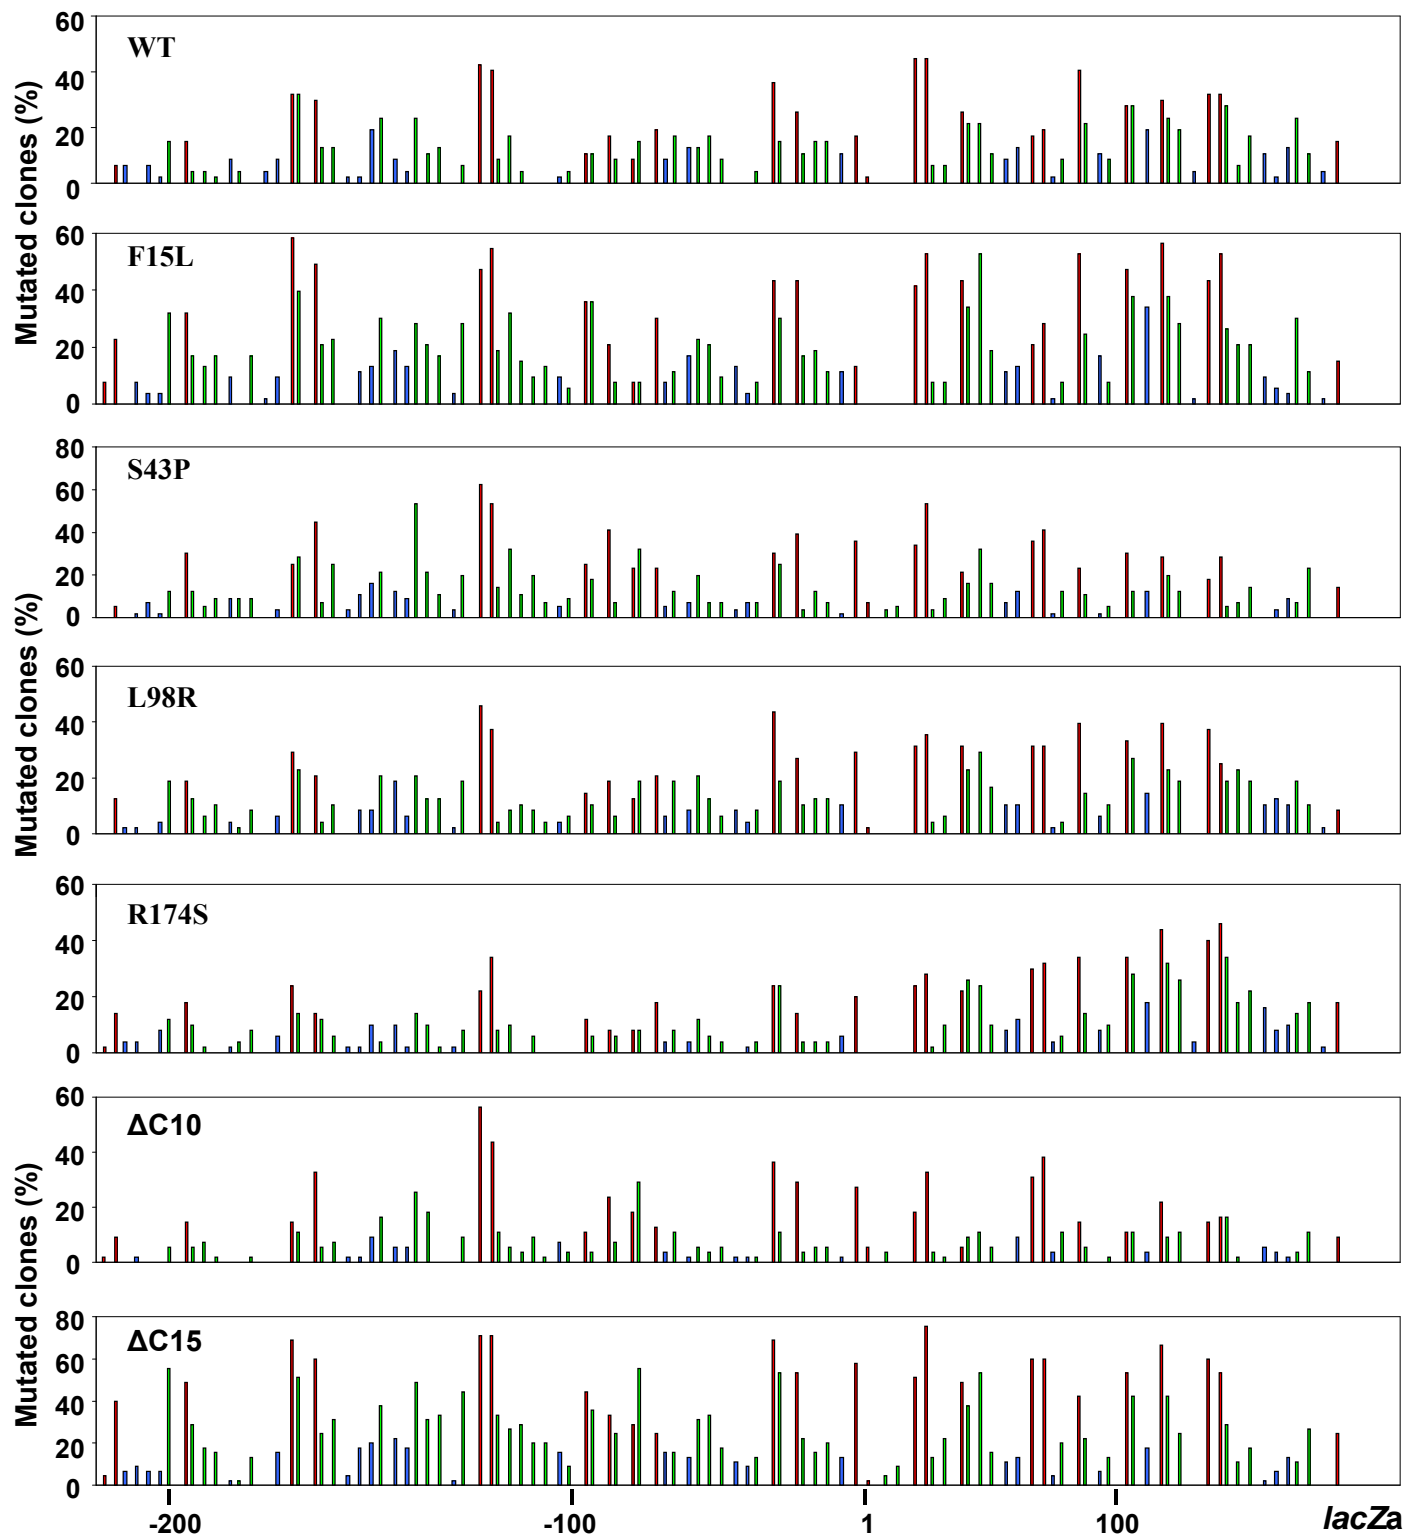

**Supplemental Figure S1.** *lacZa* C  $\rightarrow$  U deamination spectra of WT and mutant AID at 5 min incubation time. The data for each WT and mutant AID were obtained by sequencing about 50 individual mutant clones. Deaminations resulting in C  $\rightarrow$  T mutations in the *lacZa* target sequence are identified as clear or light blue plaques, whereas non-mutated phage appear as dark blue plaques (see Methods). Each colored bar represents a percentage of mutated phage clones with a C  $\rightarrow$  T mutation at the indicated position on the *lacZa* target sequence (-217 to +149). Red bars identify C deaminations occurring in 5'WRC hot-spot motifs, blue bar represent 5'SYC cold-spot motifs, and green bars represent neutral motifs (neither WRC nor SYC).

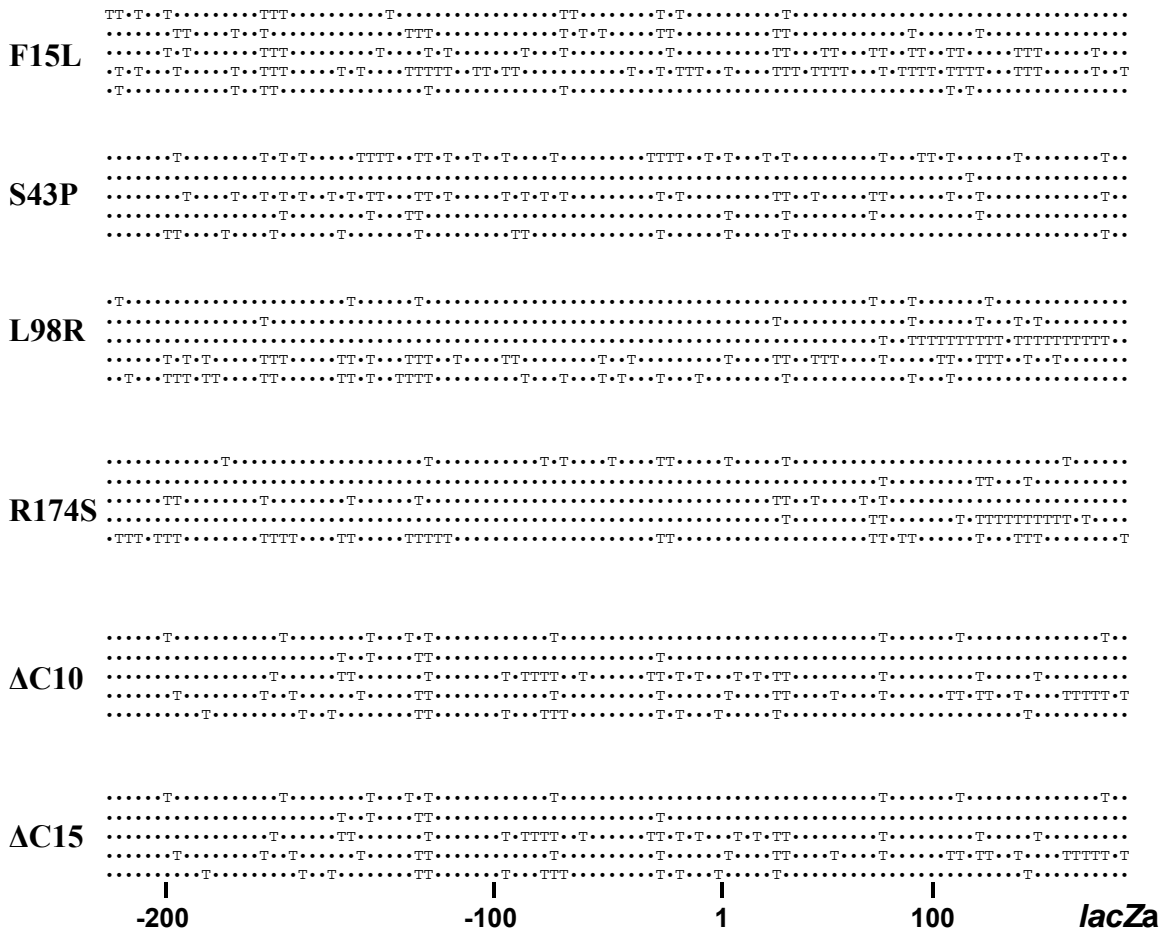

**Supplemental Figure S2.** Representative mutated M13 phage clones catalyzed by mutant AID on the ssDNA *lacZa* target. Deamination by WT and mutant AID were detected as C → T mutations by sequencing individual phage DNA isolated from the mutant (white or light blue) M13 plaques. For each AID mutant, 5 mutated clones are shown. T represent deaminated C and dots “.” denote non-deaminated C on the *lacZa* target. There are 106 C target sites on the *lacZa*.

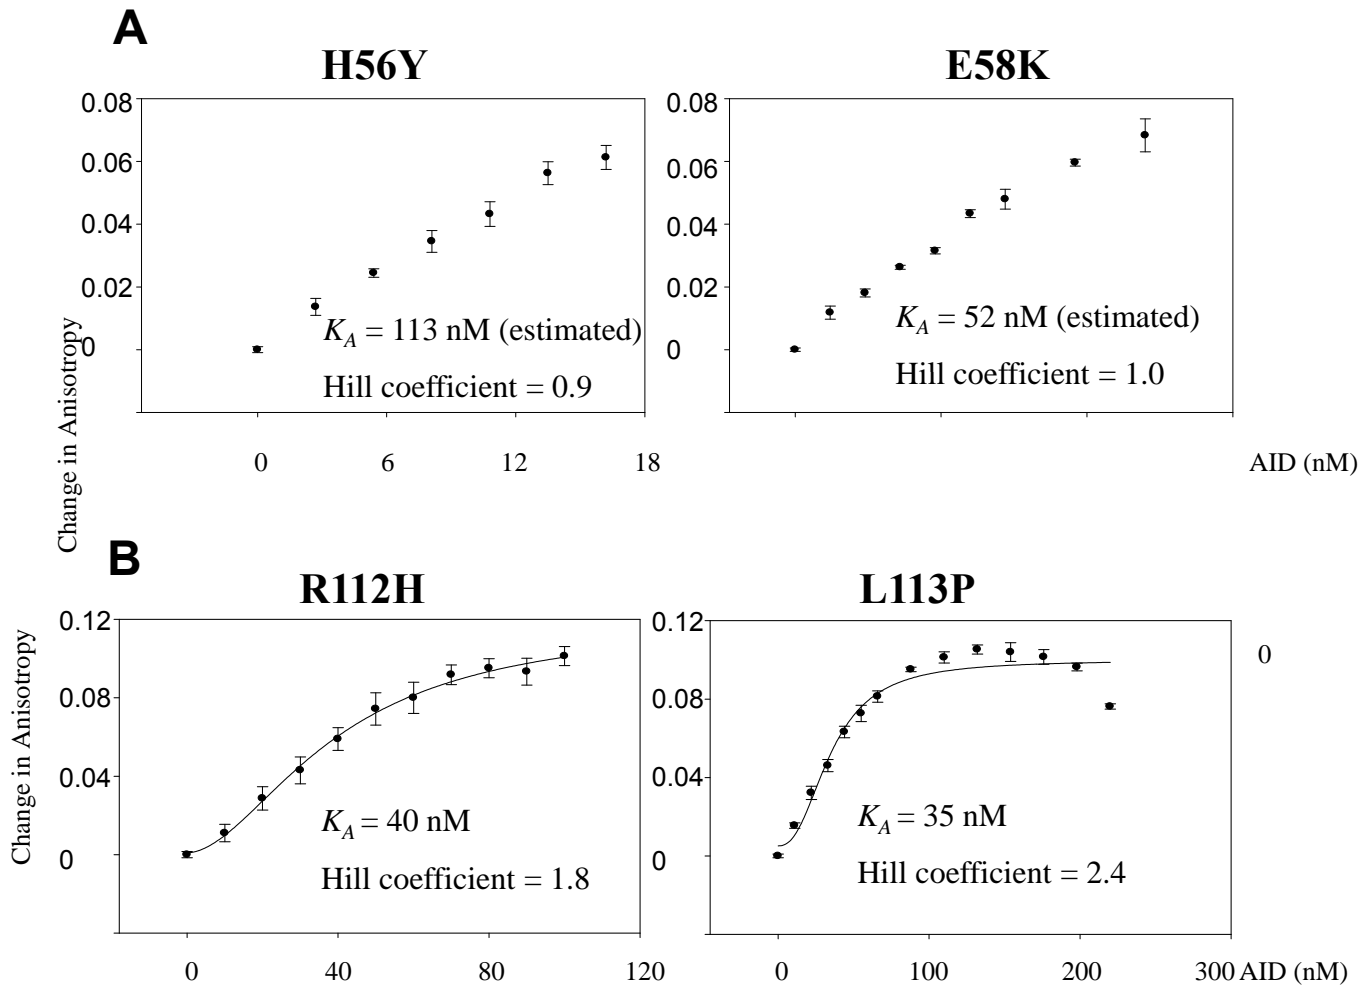

**Supplemental Figure S3.** ssDNA binding activity of HIGM-2 mutant AID. **A**, Binding of active site mutants (Class I) H56Y and E58K to a Fluorescein-labeled 36-nt oligonucleotide substrate. Due to low concentration of the mutant proteins, the changes in rotational anisotropy did not reach saturation, therefore the  $K_A$  were estimated by fitting to hyperbolic binding curve. **B**, Binding of HIGM-2 Class II mutants (R112H and L113P) that affect AID substrate interaction. The changes in rotational anisotropy were plotted with increasing AID concentrations and fit to either a sigmoidal binding curve. Values for each data point represent the mean  $\pm$  S.E which were determined from 3 independent measurements.

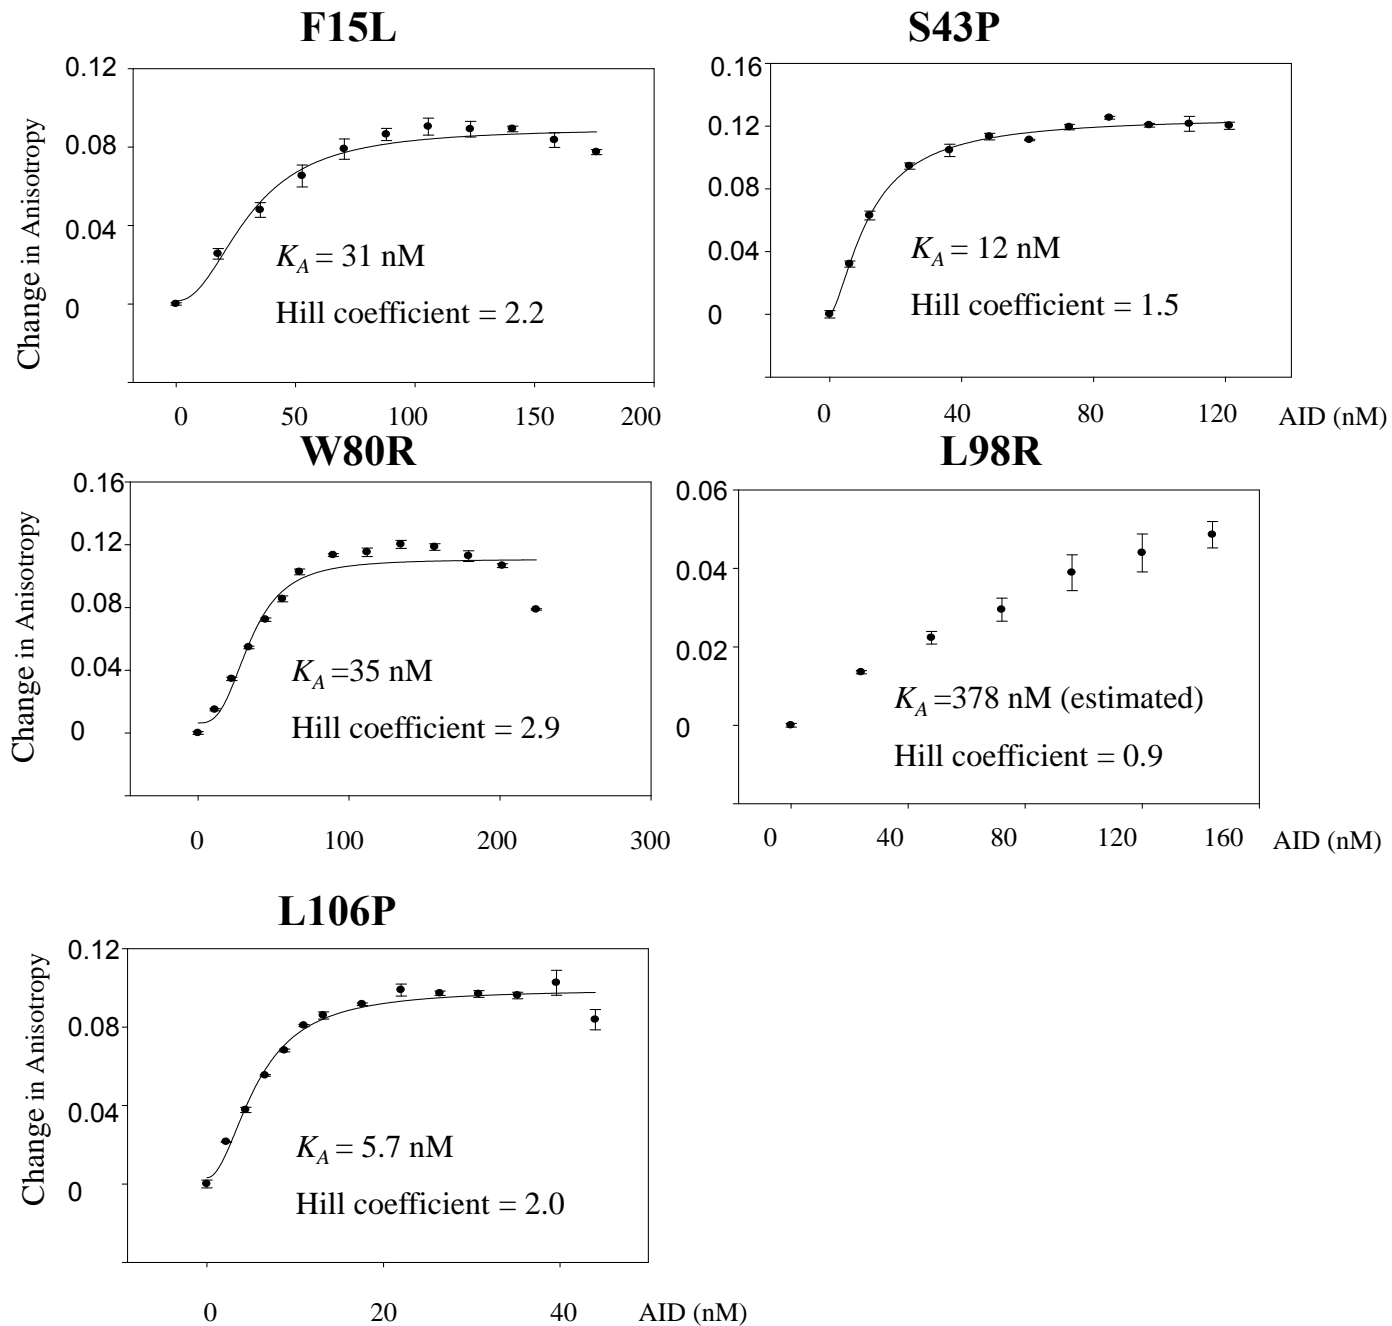

**Supplemental Figure S4.** Binding of HIGM-2 Class III mutants with mutations important for AID structure. The changes in rotational anisotropy were plotted with increasing AID concentrations and fit to either a sigmoidal binding curve. Values for each data point represent the mean  $\pm$  S.E which were determined from 3 independent measurements.

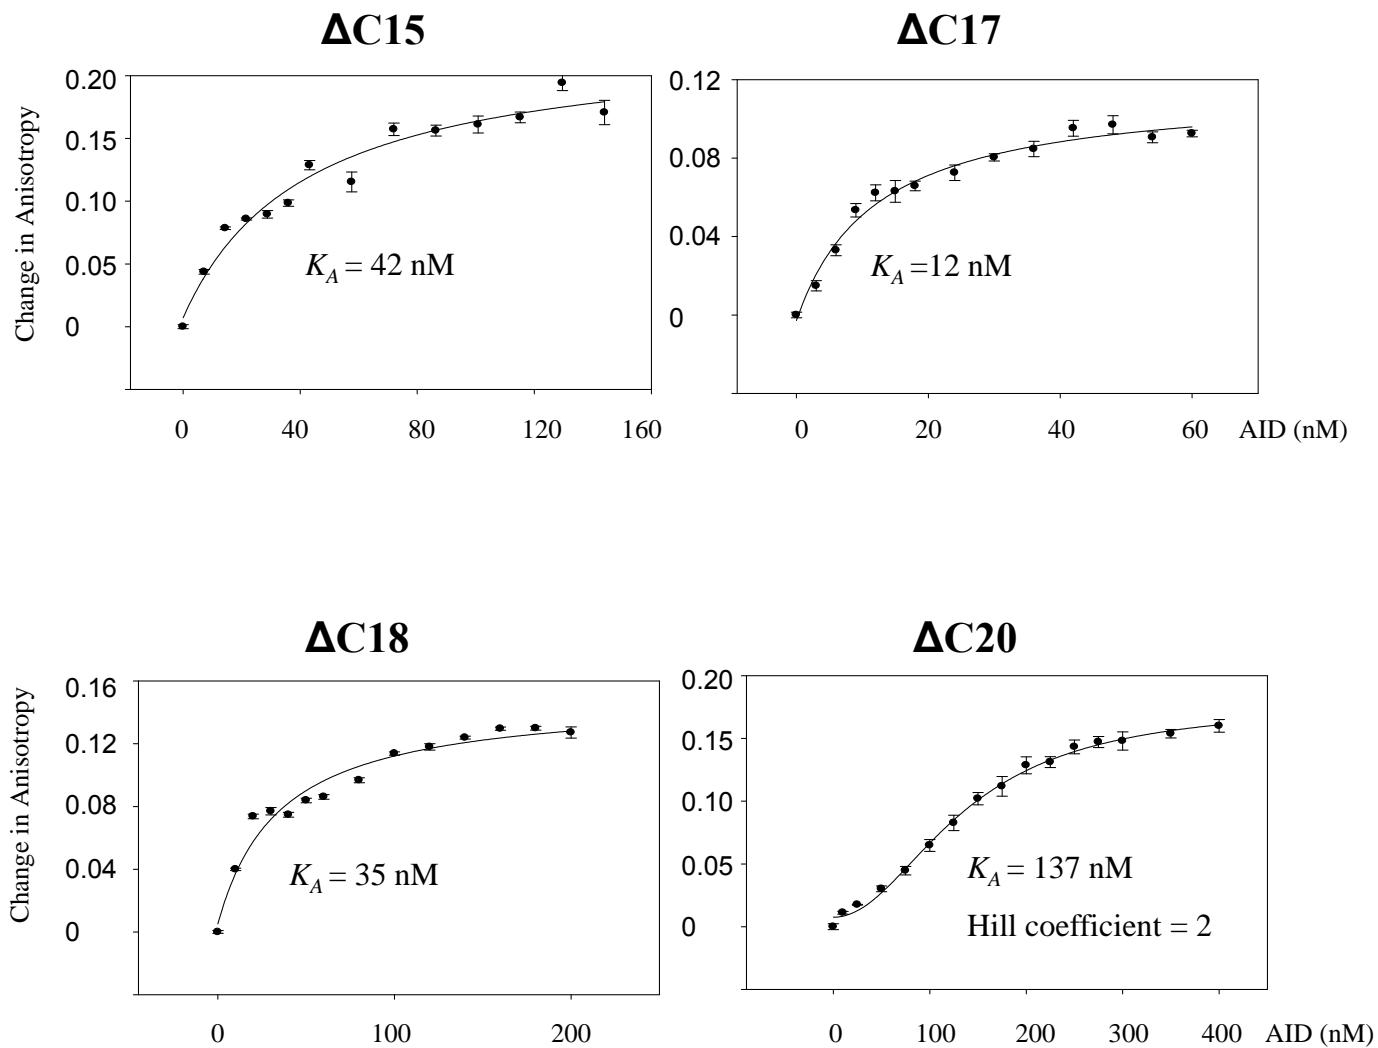

**Supplemental Figure S5.** Binding of C-terminal deletion AID (Class IV). The changes in rotational anisotropy were plotted with increasing AID concentrations and fit to either a rectangular hyperbola ( $\Delta C_{15}$ ,  $\Delta C_{17}$  and  $\Delta C_{18}$ ) or sigmoidal binding curve ( $\Delta C_{20}$ ). Values for each data point represent the mean  $\pm$  S.E which were determined from 3 independent measurements.
